# Supplementary material for: Elucidation of the Core Betalain Biosynthesis Pathway in Amaranthus tricolor
Source: Research Square preprint supplement (doi:10.21203/rs.3.rs-110761/v1), 2020-11-25
Supplement: Supplementary file 4 [file 7d1486cca06c53f4c08a88c0.xlsx]

## Sheet: 工作表1
Genes	Primer sequences	Data source
AmCYP76AD1	For 5' ATGTTGACTTTGATGTTGGCT 3'	KY792593.1
	Rev 5' CAATGCCTACGGGATGGAATG 3'
AmDODAα1	For 5' CAACCCAAGTTAAGTGGAACA 3'	MT741955
	Rev 5' TGAAAATGTGGGGTTTCATCC 3'	(This study)
AmDODAα2 (AmDODA)	For 5' CAATCACACTTGGATGGCATG 3'	KP165399.1
	Rev 5' AATAATGGGGAGTGTTATTTG 3'
AmcDOPA5GT	For 5' CGGCAGTTGTAATTGGACAGA 3'	KP174811.1
	Rev 5' TCAGCTCAAAGTAGCCTTACG 3'
AmB5GT	For 5' AGTTAGAACCCGAATATGCAG 3'	KP174810.1
	Rev 5' AGCATTCATGTTCATCAATGG 3'
AmUGT79B30-like4	For 5' TAGAGTGGAAGATTGGGGTCG 3'	AH018629‐RA
	Rev 5' AGCCCTAACTTCTCTCCCAAC 3'
AmMYB1	For 5' GGTCCTTGATTGCAGCTAGAC 3'	KU557504.1
	Rev 5' TGGGAAGTGCTTCATTAGAAG 3'
AmADHα	For 5' AACAACTTTCTGGGCATTTGC 3'	MF346291.1
	Rev 5' GAAGGAACAATCTGAGGAAGG 3'
AmPPO	For 5' CCATCTTCCTCCAATGGTCAC 3'	KY792594.1
	Rev 5' TGCATTGGAAACCATTTGACG 3'
AmCATPO	For 5' AGCCTTATCTGATCCTCGCCT 3'	KP710221.1
	Rev 5' TGGTCTTATGTTAAGTCTACT 3'
AmTyDC	For 5' GTGGTATACGGGTCCGATCAG 3'	KP165397.1
	Rev 5' GGGAATAAGAATTGGATCTGG 3'
AmActin	For 5' GCTGCAGGTATCCACGAGACT 3'	EF452618.1
	Rev 5' GTTGTACCACCATTGAGCACG 3'
