# Supplementary material for: Elucidation of the Core Betalain Biosynthesis Pathway in Amaranthus tricolor
Source: Research Square preprint supplement (doi:10.21203/rs.3.rs-110761/v1), 2020-11-25
Supplement: Supplementary file 5 [file a4b3439908409024822b3ee7.docx]

**Supplementary file**

**Elucidation of the Core Betalain Biosynthesis Pathway in *Amaranthus tricolor***

**Running head:** Betalain Biosynthesis in *Amaranthus tricolor*

Yu-Cheng Chang1, Yi-Ching Chiu1, Nai-Wen Tsao2, Yuan-Lin Chou1, Choon-Meng Tan1, Yi-Hsuan Chiang1, Pei-Chi Liao1, Ya-Chien Lee1, Li-Ching Hsieh3, Sheng-Yang Wang2 and Jun-Yi Yang1,4,5,*

1Institute of Biochemistry, National Chung Hsing University, Taichung 402, Taiwan

2Department of Forestry, National Chung Hsing University, Taichung 402, Taiwan

3Institute of Genomics and Bioinformatics, National Chung Hsing University, Taichung 402, Taiwan

4Institute of Biotechnology, National Chung Hsing University, Taichung 402, Taiwan

5Advanced Plant Biotechnology Center, National Chung Hsing University, Taichung 402, Taiwan

**Corresponding author: J.-Y. Yang**

Institute of Biochemistry, National Chung Hsing University, 145 Xingda Road, Taichung 40227, Taiwan

886-4-22840468 ext. 232 (Tel.); 886-4-22853487 (Fax)

jyang@nchu.edu.tw

**
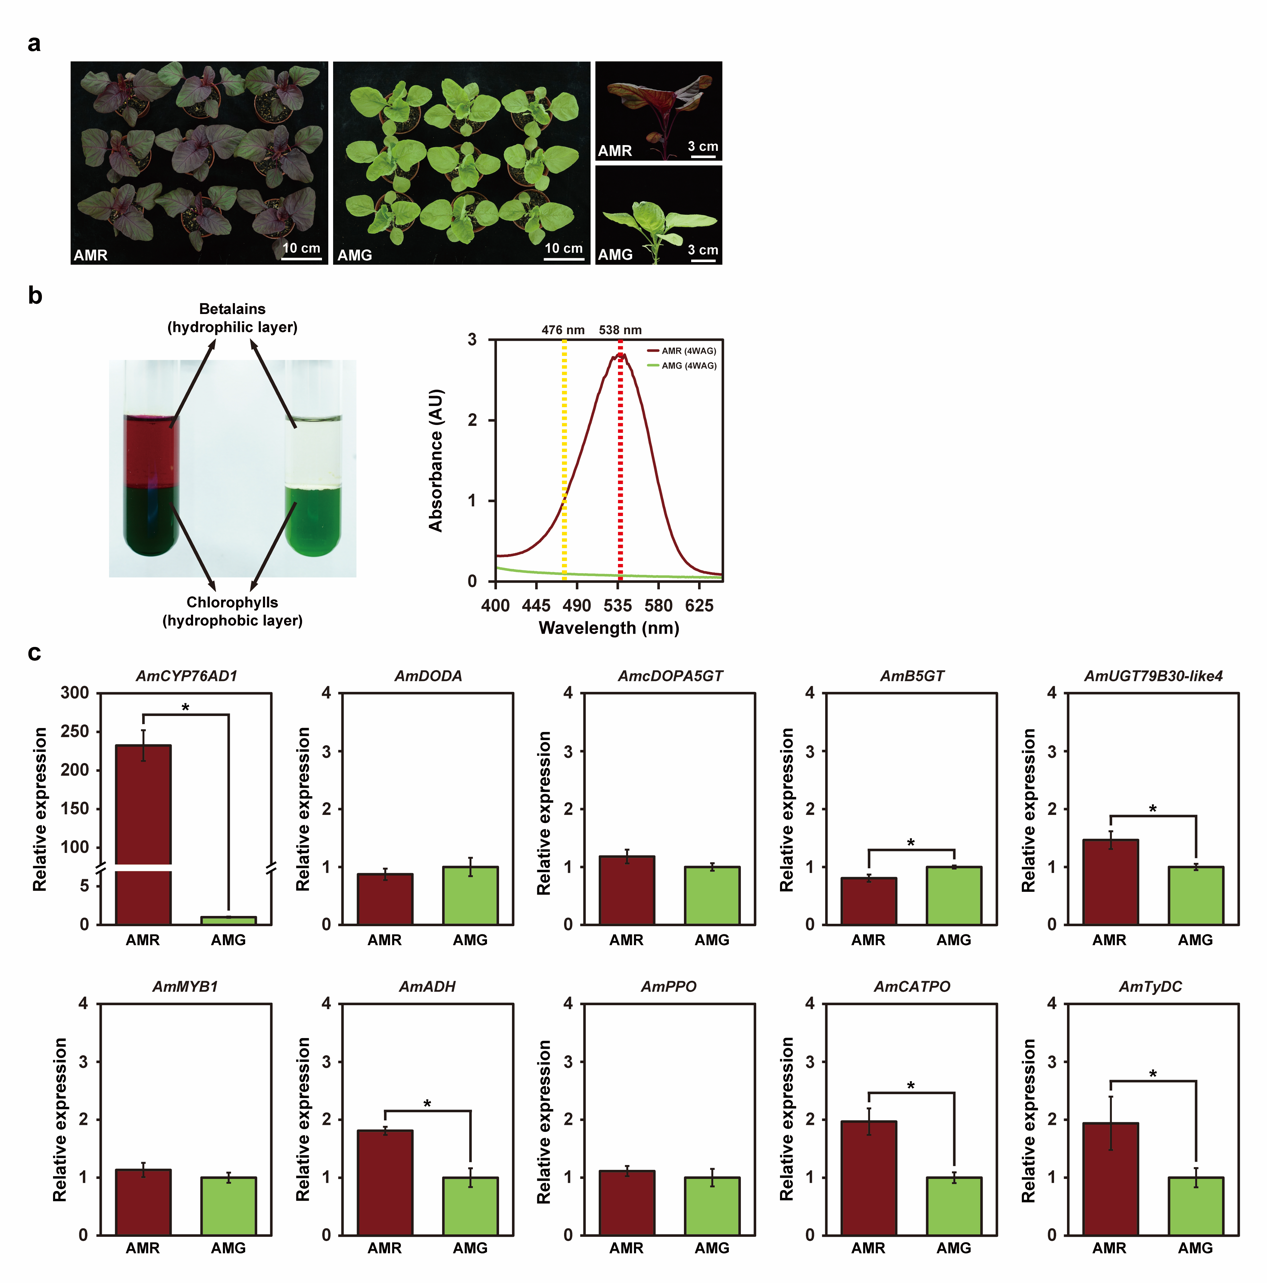
**

**Supplementary Fig. S1** **Identification of *AmCYP76AD1* as a key element required for betalain pigment production in *Amaranthus tricolor*.** (**a**) The leaf-color phenotypes of the red-leaf cultivar (AMR) and green-leaf cultivar (AMG) in four-week-old *A. tricolor* plants. (**b**) Extraction of chlorophyll pigments (hydrophobic layer) and betalain pigments (hydrophilic layer) from four-week-old leaves of AMR and AMG (left panel). Absorbance spectra for the extracted betalain pigments from AMR and AMG (right panel). The absorbance at 538 nm, for betacyanins, is indicated with a red dashed line, and the absorbance at 476 nm, for betaxanthins, is indicated with a yellow dashed line. (**c**) Expression levels of genes related to the betalain biosynthesis pathway in four-week-old AMR and AMG plants analyzed by qRT-PCR. Statistically significant differences were determined using Student’s *t*-test (**P* < 0.01 for AMR versus AMG).

**
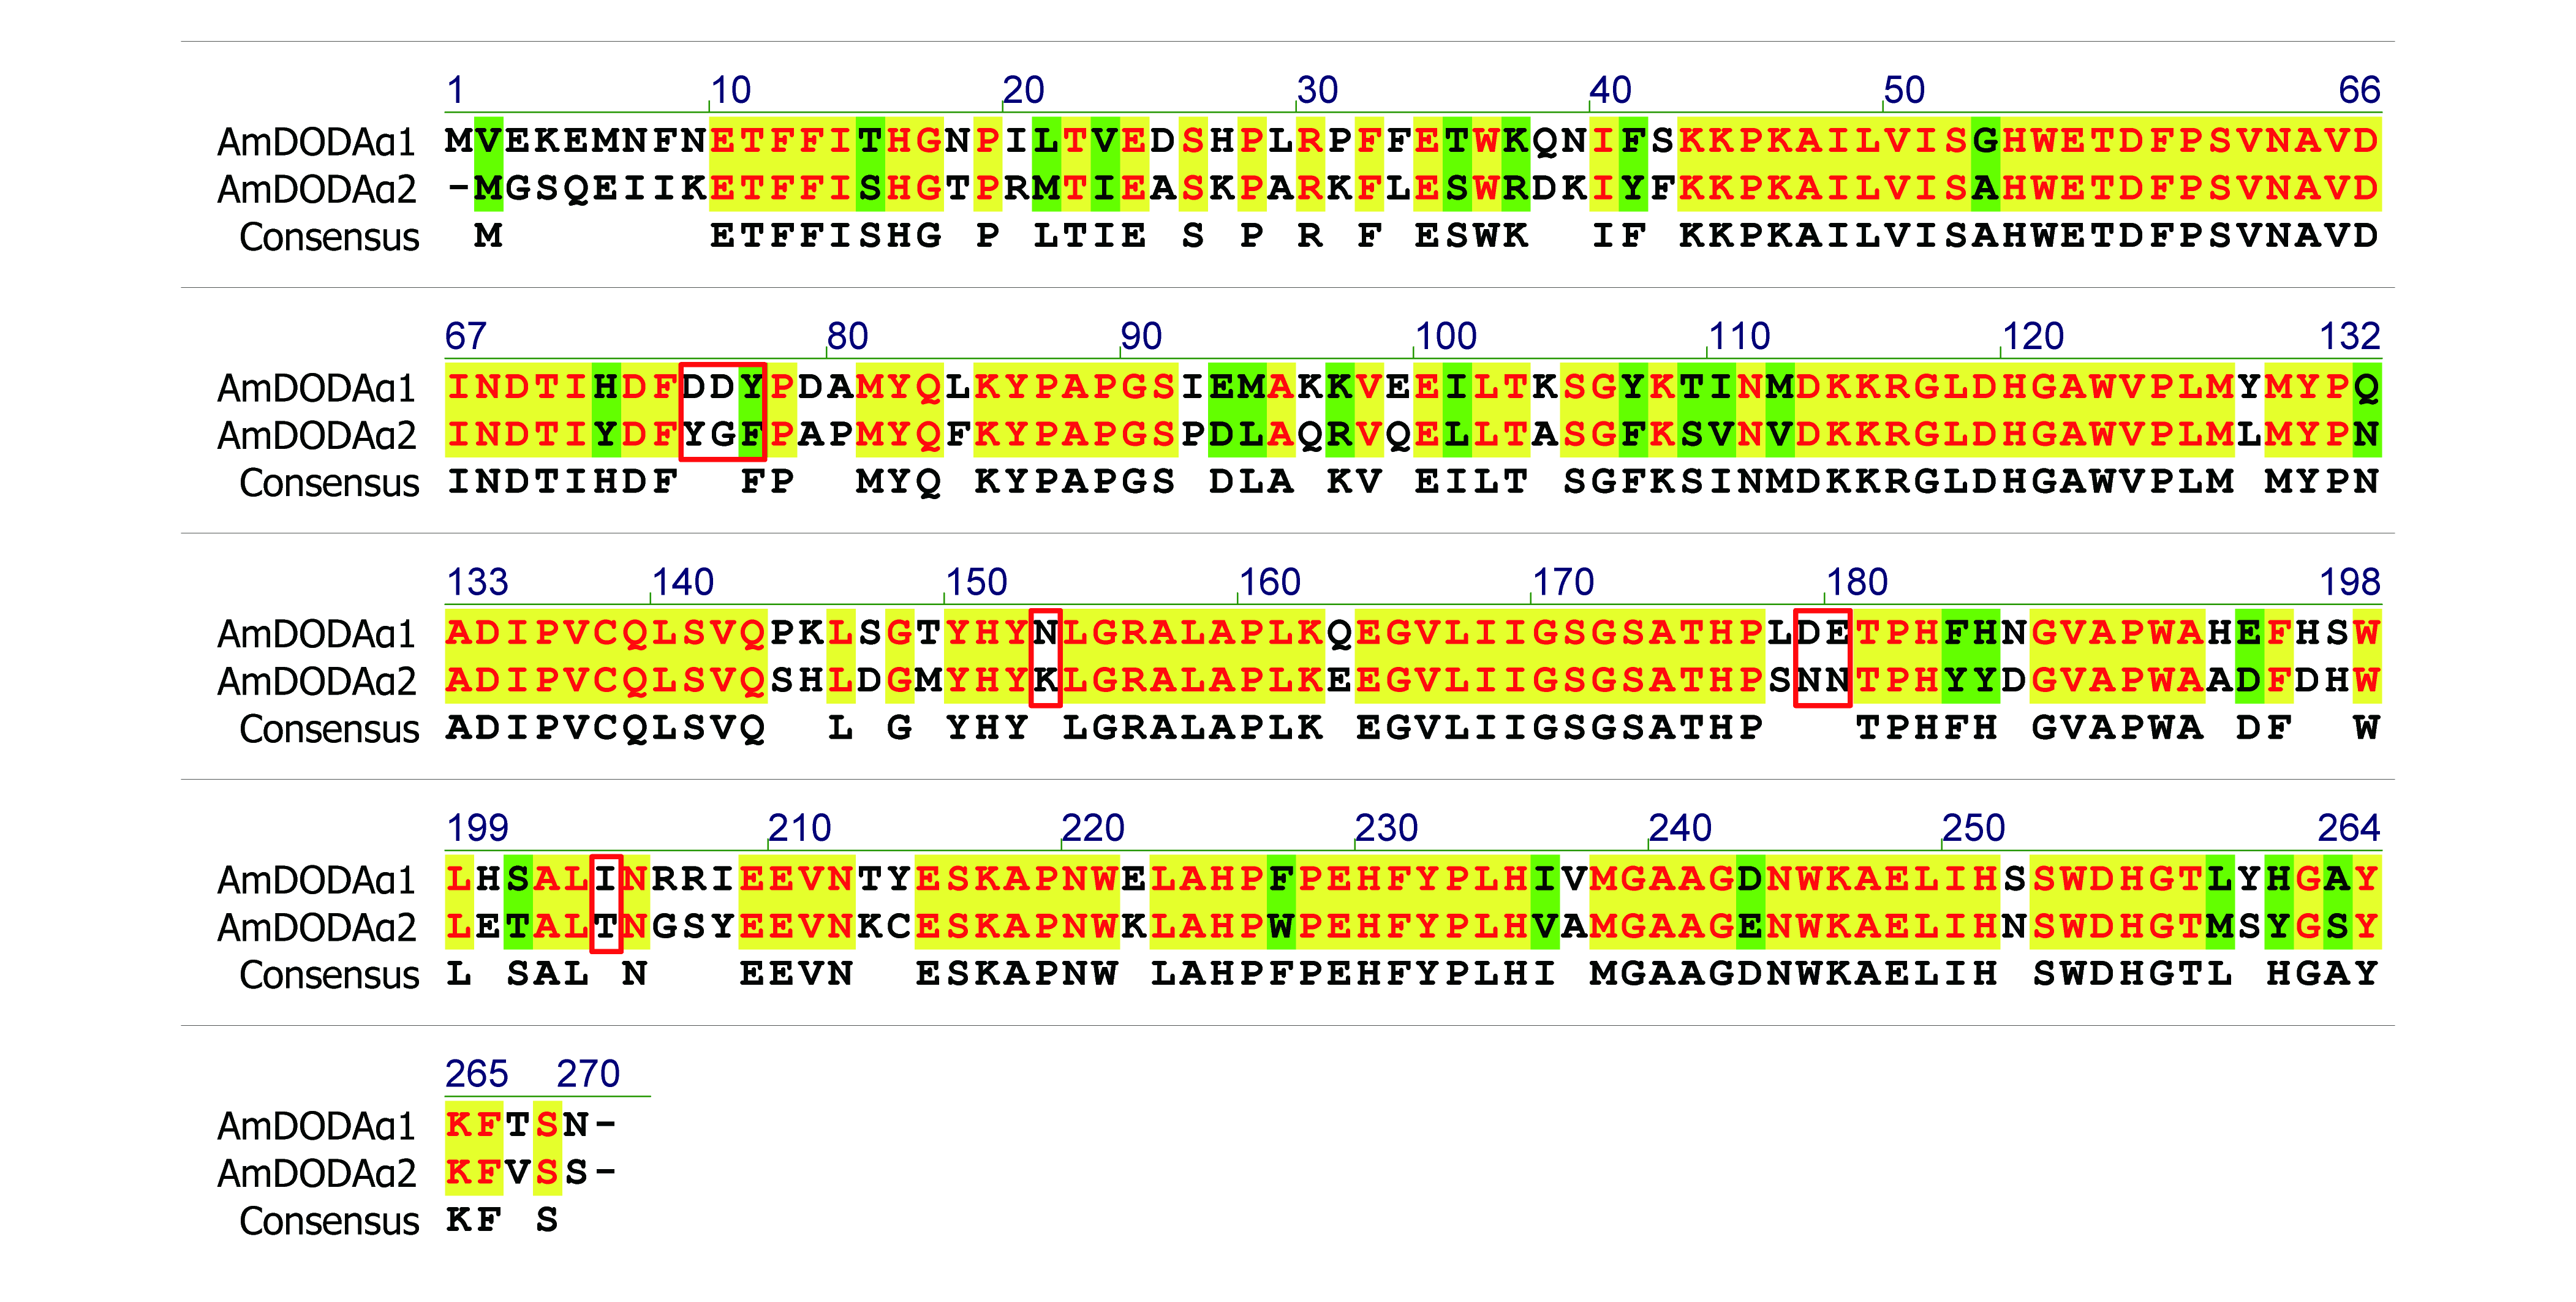
**

**Supplementary Fig. S2 Protein sequence comparisons of AmDODAa1 and AmDODAa2.** Identical residues are highlighted in yellow; similar residues are highlighted in green. The residues used for LOGO analysis are indicated with a red rectangle.


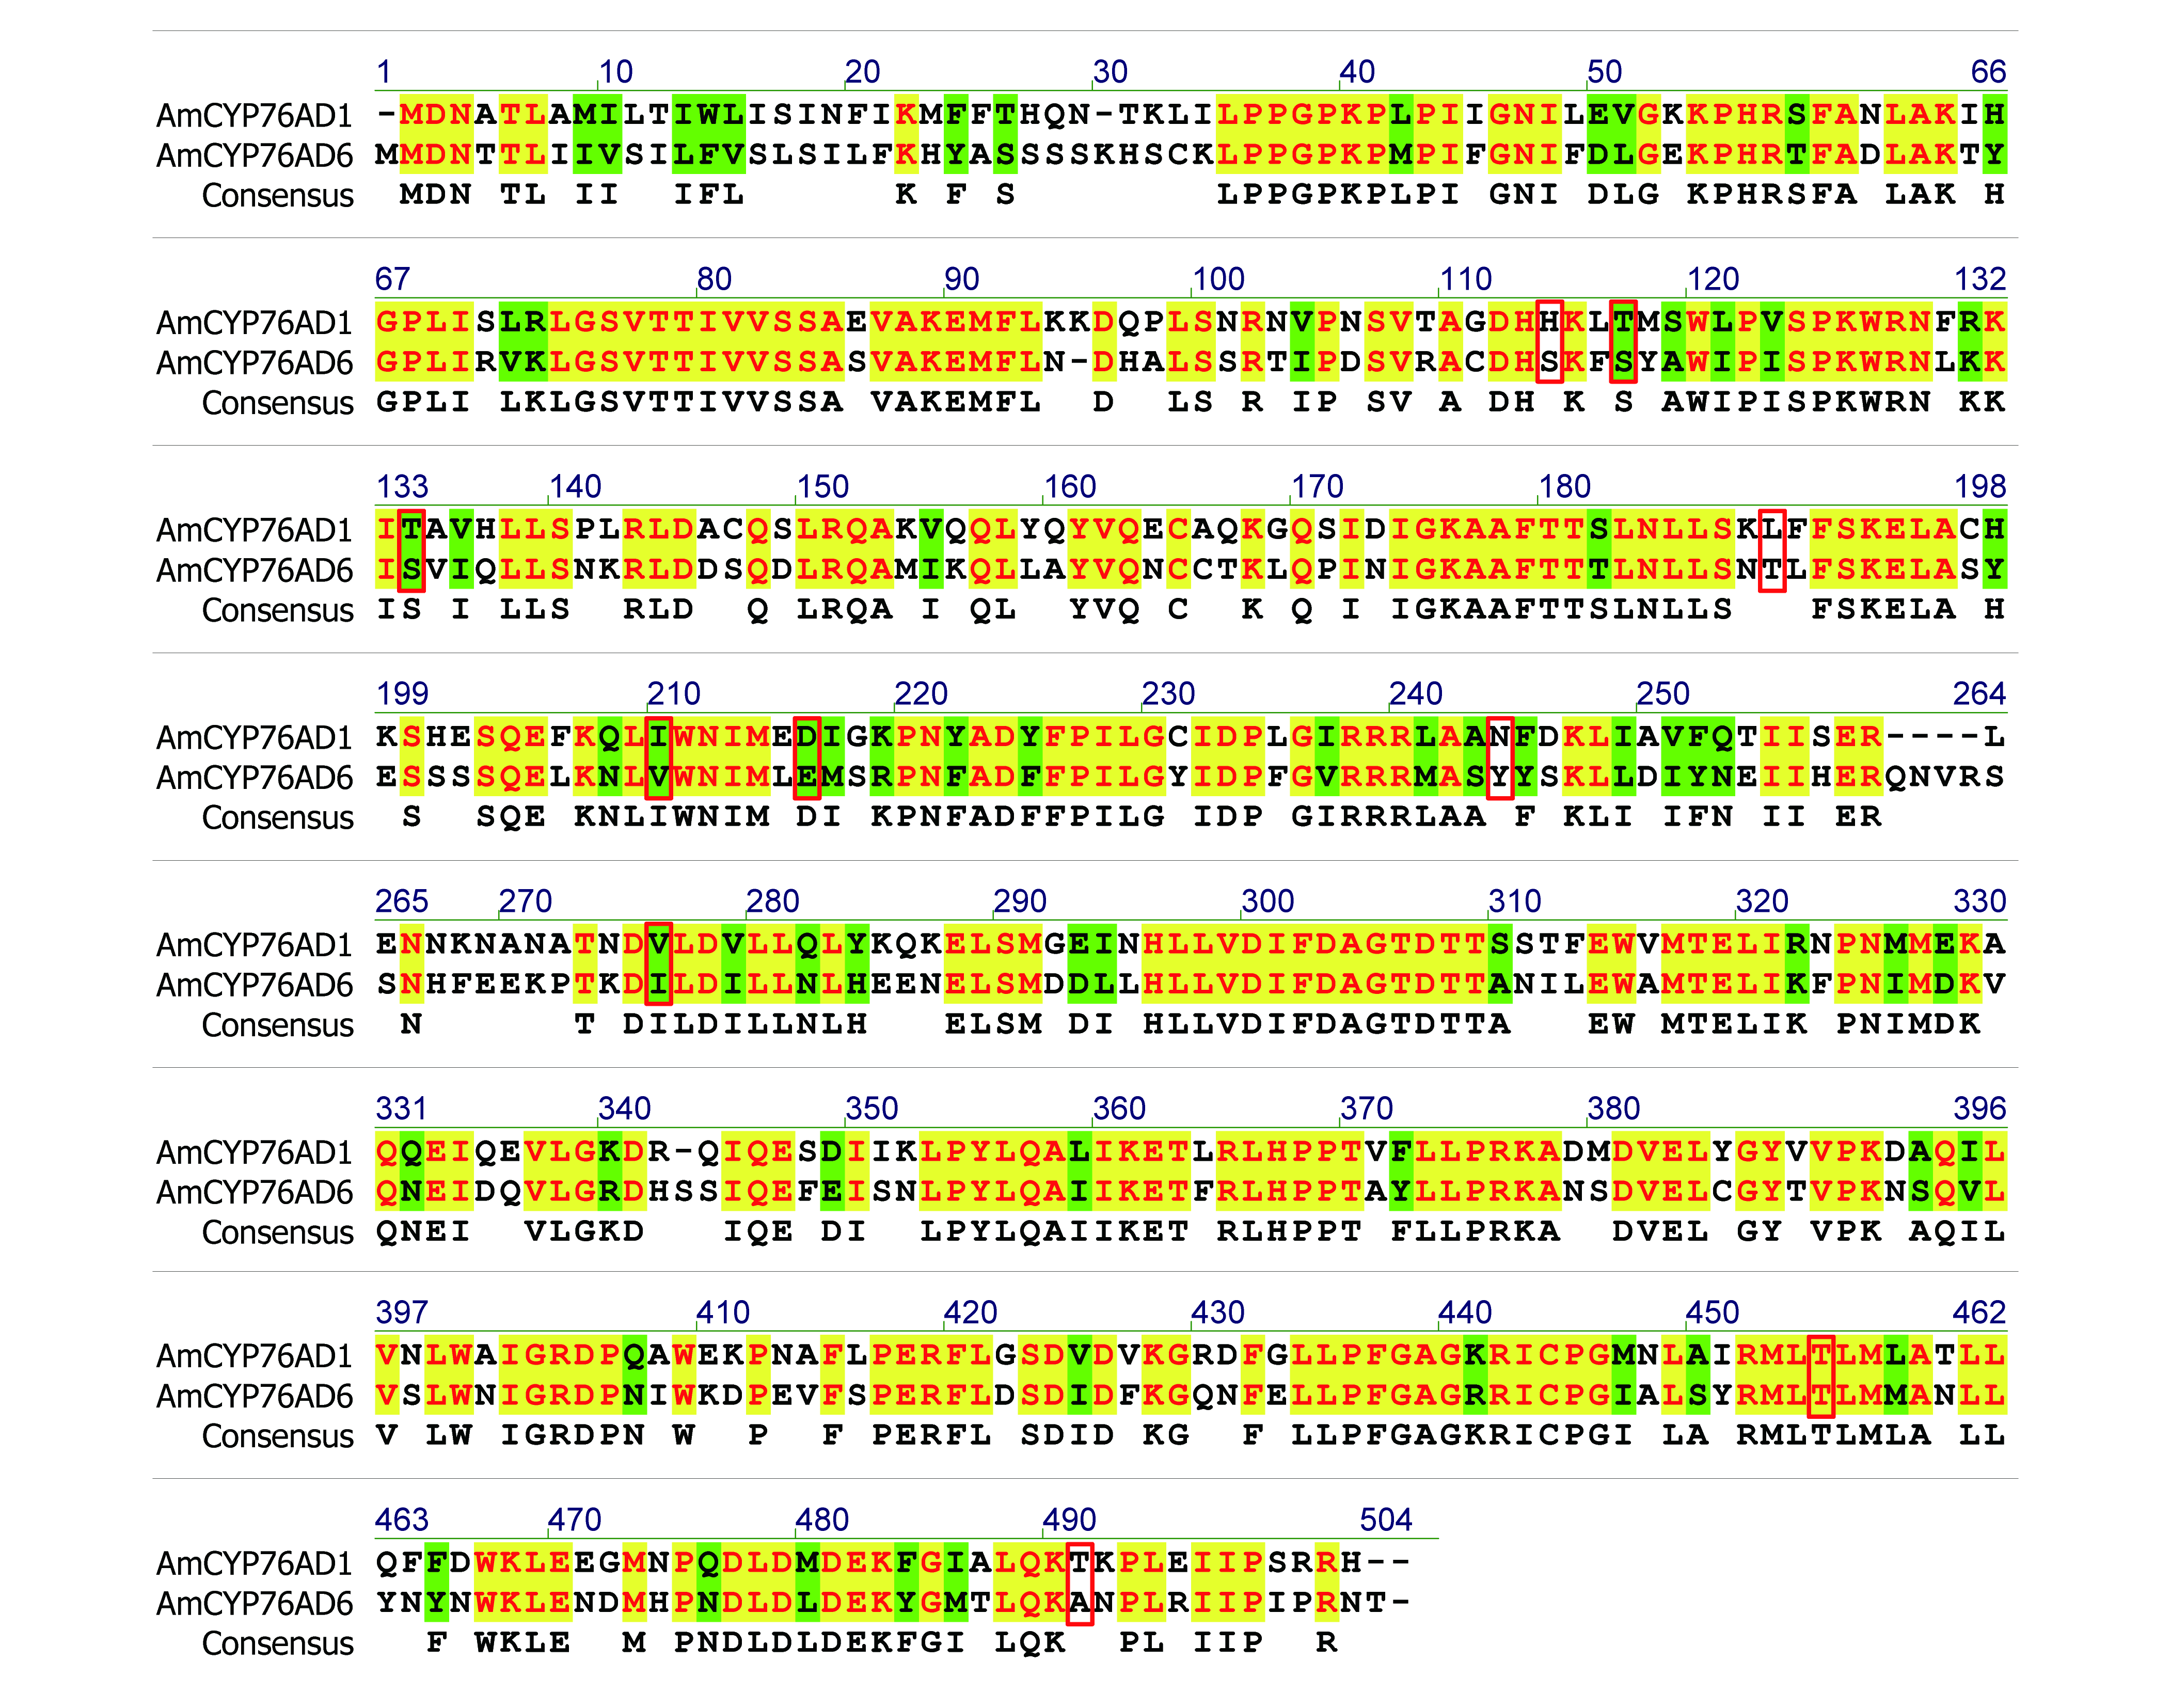


**Supplementary Fig. S3 Protein sequence comparisons of AmCYP76AD1 and AmCYP76AD6.** Identical residues are highlighted in yellow; similar residues are highlighted in green. The residues used for LOGO analysis are indicated with a red rectangle.


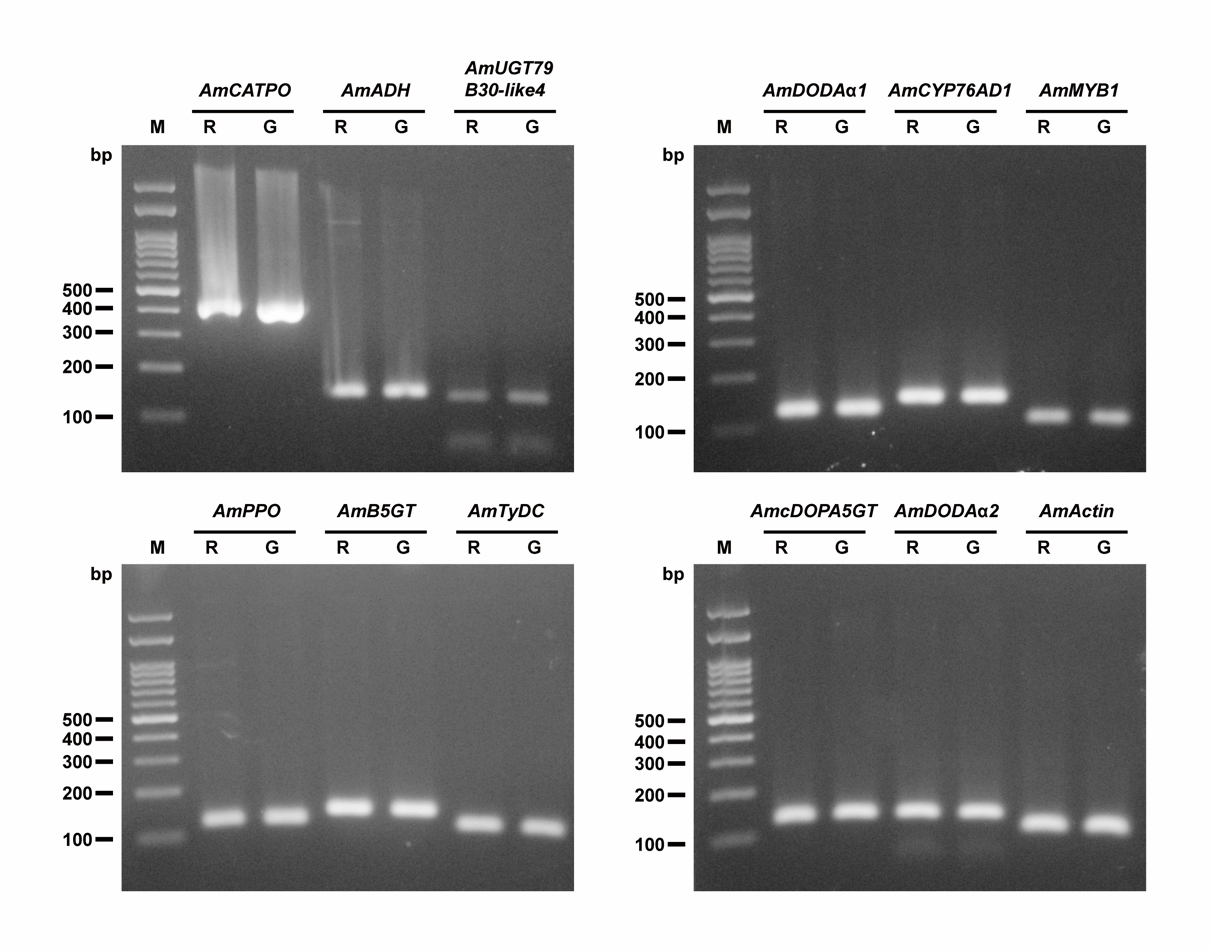


**Supplementary Fig. S4 PCR analyses.** Genomic DNA extracted from the red-leaf cultivar (R) and green-leaf cultivar (G) of *A. tricolor* was used as template. The primers were identical to those used for qRT-PCR analyses (Supplementary Table S1).
