# Supplementary material for: Elucidation of the Core Betalain Biosynthesis Pathway in Amaranthus tricolor
Source: Research Square preprint supplement (doi:10.21203/rs.3.rs-110761/v1), 2020-11-25
Supplement: Supplementary file 6 [file e19bcef822889b681e1884a2.xlsx]

## Sheet: 工作表1
Genes	Primer sequences	Vectors	Experimental assays	Data source
BvCYP76AD1	For 5' ACTGCTCGAGATGGATCATGCAACATTAGCAATG 3'	pBA002-C-YFP	Agroinfiltration in N. benthamiana	HQ656023.1
	Rev 5' ACTGCTCGAGATGGATCATGCAACATTAGCAATG 3'
BvDODAα1	For 5’ ACTGCTCGAGATGGATAACACTACACTTGCATTG 3’	pBA002-C-SFP	Agroinfiltration in N. benthamiana	HQ656027.1
	Rev 5’ CTAGGGATCCTTTCCTAGGTACGGGAATAACTTG 3’
MjDOPA5GT	For 5’ AGCTCTCGAGATGAACACCAATGGTGAAGGTGA 3’	pBA002-C-SFP	Agroinfiltration in N. benthamiana	AB182643.1
	Rev 5’ TCAGGGATCCTTGAAGAGAAGGTTCCAACTTAGC 3’
AmCYP76AD1	For 5’ AGCTCTCGAGATGGATAATGCAACCCTAGCAATG 3’	pBA002-C-YFP	Agroinfiltration in N. benthamiana	MT740230
	Rev 5’ TCAGGGATCCATGCCTACGGGATGGAATGATTTC 3’			(This study)
AmDODAα1	For 5’ AGCTCTCGAGATGGTAGAAAAAGAAATGAATTTC 3’	pBA002-C-SFP	Agroinfiltration in N. benthamiana	MT741955
	Rev 5’ TCAGGGATCCGTTGGAAGTGAACTTGTAGGCACC 3’			(This study)
AmDODAα2 (AmDODA)	For 5’ ACTGCTCGAGATGGGTAGTCAAGAAATCATCAAAG 3’ Rev 5’ CTAGACGCGTGCTTGAAACAAATTTGTAGGATCCA 3’	pBA002-C-SFP	Agroinfiltration in N. benthamiana	MT741954 (This study)
AmcDOPA5GT	For 5’ ACTGCTCGAGATGGATTCATCAAAAACAAAGCACAT 3’	pBA002-C-SFP	Agroinfiltration in N. benthamiana	MT741956
	Rev 5’ CTAGGGATCCGCTCAAAGTAGCCTTACGAGAAACA 3’			(This study)
BvDODAα1	For 5’ AGCTGGATCCATGAAAATGATGAATGGTGAAGATG 3’	pET-SUMO	Recombinant protein expression	HQ656023.1
	Rev 5’ TCAGCTCGAGCTAGGCTGAAGTGAACTTGTAGGA 3’			(This study)
AmDODAα1	For 5' AGCTGGATCCATGGTAGAAAAAGAAATGAATTTCAAT 3'	pET-SUMO	Recombinant protein expression	MT741955
	Rev 5' TCAGCTCGAGTTAGTTGGAAGTGAACTTGTAGGC 3'			(This study)
AmDODAα2 (AmDODA)	For 5’ AGCTAGATCTATGGGTAGTCAAGAAATCATCAAAG 3’ Rev 5’ TCAGCTCGAGTCAGCTTGAAACAAATTTGTAGGA 3’	pET-SUMO	Recombinant protein expression	MT741954 (This study)
AmCYP76AD1	For 5’ ACTGGAATTCGATATGTTGTGCCTAAAGATGCAC 3’	pTRV2	Virus-induced gene silencing	MT740230
	Rev 5’ CTAGCTCGAGGGAATGATTTCAAGAGGCTTGGTC 3’			(This study)
