# Supplementary material for: Elucidation of the Core Betalain Biosynthesis Pathway in Amaranthus tricolor
Source: Research Square preprint supplement (doi:10.21203/rs.3.rs-110761/v1), 2020-11-25
Supplement: Supplementary file 8 [file 0d2ebeabc1062a5b10bdca15.xlsx]

## Sheet: 工作表1
CYP76AD homologues	Species	Families	Data source
AmCYP76AD1	Amaranthus tricolor	Amaranthaceae	QOP57914
BvCYP76AD1	Beta vulgaris	Amaranthaceae	AET43289.1
AhcCYP76AD2	Amaranthus hybridus	Amaranthaceae	AET43291.1
MjCYP76AD3	Mirabilis jalapa	Nyctaginaceae	AET43292.1
CcCYP76AD4	Celosia cristata	Amaranthaceae	AGI78466.1
BvCYP76AD5	Beta vulgaris	Amaranthaceae	AJD87473.1
AmCYP76AD6	Amaranthus tricolor	Amaranthaceae	This study
BvCYP76AD6	Beta vulgaris	Amaranthaceae	AJD87474.1
MjCYP76AD7	Mirabilis jalapa	Nyctaginaceae	AJD87463.1
BaCYP76AD13	Basella alba	Basellaceae	AJD87469.1
MjCYP76AD15	Mirabilis jalapa	Nyctaginaceae	AJD87471.1
CbCYP76AD16	Cleretum bellidiforme	Aizoaceae	AJD87472.1
DODA homologues	Species	Families	Data source
AmDODAα1	Amaranthus tricolor	Amaranthaceae	QOP57916
BvDODAα1	Beta vulgaris	Amaranthaceae	QED21480.1
CgDODAα1	Carnegiea gigantea	Cactaceae	QED21473.1
CqDODAα1	Chenopodium quinoa	Amaranthaceae	XP_021769303.1
McDODAα1	Mesembryanthemum crystallinum	Aizoaceae	QED21476.1
MjDODAα1	Mirabilis jalapa	Nyctaginaceae	AJD87536.1
PmDODα1	Parakeelya mirabilis	Montiaceae	AIS23503.1
ShDODA1α1	Stegnosperma halimifolium	Stegnospermataceae	QED21470.1
AmDODAα2 (AmDODA)	Amaranthus tricolor	Amaranthaceae	QOP57915
BvDODAα2	Beta vulgaris	Amaranthaceae	QED21481.1
CgDODAα2	Carnegiea gigantea	Cactaceae	QED21474.1
McDODAα2	Mesembryanthemum crystallinum	Aizoaceae	QED21477.1
PmDODα2	Parakeelya mirabilis	Montiaceae	AIS23504.1
